# Supplementary material for: Genomic landscape and gene expression profiles of feline oral squamous cell carcinoma
Source: Front Vet Sci. 2023 May 17;10:1079019. doi: 10.3389/fvets.2023.1079019 (PMC10229771; doi:10.3389/fvets.2023.1079019)
Supplement: Supplementary file 1 [file Data_Sheet_1.xlsx]

## Sheet: Fig S5
Figure S5A. Principal component analysis showing that FOSCC clusters apart from normal oral mucosa samples (NOM).							Figure S5B. Principal component analysis based on anatomical location (maxilla or mandible) and RNA isolation method used. The RNA of all FOSCC maxillary samples and normal oral mucosal samples (NOM) was isolated using the same methods; RNA of FOSCC mandibular samples was isolated using a related method.

## Sheet: Fig S6
Supplemental Figure S4. Normalized enrichment plots (top) and corresponding heatmaps depicting the top 50% of leading edge genes of relevant pathways identified by GSEA in FOSCC compared to NOM using the MSigDB Hallmark collection.

## Sheet: Table S3
Table S3. GSEA normalized enrichment scores (NES) of FOSCC vs NOM using the MSigDB Hallmark gene sets collection. The size column indicates the number of genes represented in each gene set, and the FDR q-value represents the false discovery rate for each analysis. The enrichment plot on the right corresponds to FOSCC vs NOM.
NAME	SIZE	NES	FDR q-val
EPITHELIAL_MESENCHYMAL_TRANSITION	174	9.01164	0
TNFA_SIGNALING_VIA_NFKB	169	5.87777	0
INFLAMMATORY_RESPONSE	139	5.36733	0
KRAS_SIGNALING_UP	155	4.67253	0
INTERFERON_GAMMA_RESPONSE	138	4.4626	0
INTERFERON_ALPHA_RESPONSE	74	4.12595	0
IL6_JAK_STAT3_SIGNALING	61	4.1004	0
COMPLEMENT	143	3.77412	0
COAGULATION	89	3.75986	0
APICAL_JUNCTION	149	3.40695	0
ANGIOGENESIS	27	3.40434	0
ALLOGRAFT_REJECTION	106	3.27505	0
MYOGENESIS	141	3.10565	0
IL2_STAT5_SIGNALING	149	2.79672	0
APOPTOSIS	131	2.70705	0
HYPOXIA	156	2.36365	0.000497098
UV_RESPONSE_UP	122	2.04605	0.00739853
UNFOLDED_PROTEIN_RESPONSE	104	1.90934	0.0155243
TGF_BETA_SIGNALING	50	1.84498	0.021831
HEDGEHOG_SIGNALING	24	1.67478	0.0470765
UV_RESPONSE_DN	127	1.67066	0.0458198
KRAS_SIGNALING_DN	90	-2.09108	0.0200551
OXIDATIVE_PHOSPHORYLATION	178	-2.25115	0.00986026
MYC_TARGETS_V1	159	-2.39779	0.00746237
E2F_TARGETS	177	1.63757	0.0516673
GLYCOLYSIS	156	1.62811	0.0523071
MYC_TARGETS_V2	47	1.54354	0.0753125
PANCREAS_BETA_CELLS	16	1.31475	0.19237
CHOLESTEROL_HOMEOSTASIS	60	1.28576	0.207246
P53_PATHWAY	174	1.27476	0.208162
ADIPOGENESIS	170	1.19878	0.26663
XENOBIOTIC_METABOLISM	125	1.05261	0.412935
MTORC1_SIGNALING	181	1.03125	0.423195
MITOTIC_SPINDLE	184	1.02498	0.417043
WNT_BETA_CATENIN_SIGNALING	34	0.791554	0.725927
SPERMATOGENESIS	52	-0.610107	0.938554
ANDROGEN_RESPONSE	91	-0.818019	0.729899
REACTIVE_OXYGEN_SPECIES_PATHWAY	42	-0.878718	0.677589
PEROXISOME	84	-0.910883	0.66391
APICAL_SURFACE	31	-0.913339	0.707215
HEME_METABOLISM	149	-0.950721	0.688288
PI3K_AKT_MTOR_SIGNALING	87	-1.0599	0.545414
FATTY_ACID_METABOLISM	121	-1.19129	0.384669
PROTEIN_SECRETION	91	-1.34823	0.239519
NOTCH_SIGNALING	30	-1.40236	0.211015
ESTROGEN_RESPONSE_LATE	142	-1.40524	0.23536
BILE_ACID_METABOLISM	76	-1.47756	0.201707
G2M_CHECKPOINT	170	-1.50808	0.20621
ESTROGEN_RESPONSE_EARLY	158	-1.61657	0.150495
DNA_REPAIR	127	-1.63503	0.172863

## Sheet: Fig S7
Figure S7. Distribution of raw (left) and normalized (right) counts per genes showing that the medians are consistent across samples after normalization.
